# Supplementary material for: Efficient optical resolution of water-soluble self-assembled tetrahedral M4L6 cages with 1,1′-bi-2-naphthol
Source: Royal Society of Chemistry journal article supplement (doi:10.1039/c4cc04145c), 2014-01-01
Supplement: c4cc04145c1.pdf [file c4cc04145c1.pdf]

## Supporting Information

### Efficient optical resolution of water-soluble self-assembled tetrahedral $M_4L_6$ cages with 1,1'-bi-2-naphthol

Shigang Wan, Li-Rong Lin,\* Lili Zeng, Yiji Lin, and Hui Zhang\*

#### Table of Content

|                                                                                                                                                        |    |
|--------------------------------------------------------------------------------------------------------------------------------------------------------|----|
| 1. General.....                                                                                                                                        | S2 |
| 2. Resolution of cage <b>T</b> with $Leu^+$ and $Bcic^+$ .....                                                                                         | S2 |
| 3. Resolution of cage <b>T</b> with $[Ru(phen)_3](PF_6)_2$ .....                                                                                       | S2 |
| 4. Resolution of cage <b>T</b> with BINOL.....                                                                                                         | S2 |
| 5. Resolution of cage $(Me_4N)_4[Ni_4L_6]$ with BINOL.....                                                                                             | S3 |
| 6. The chiral stability of resolved cages upon complexation of cyclohexane.....                                                                        | S3 |
| 7. <b>Figure S1.</b> CD spectra of cage <b>T</b> resolved by $Leu^+$ and $Bcic^+$ .....                                                                | S4 |
| 8. <b>Figure S2.</b> $^1H$ NMR spectrum of resolved cage <b>T</b> .....                                                                                | S4 |
| 9. <b>Figure S3.</b> $^{13}C$ NMR spectrum of resolved cage <b>T</b> .....                                                                             | S4 |
| 10. <b>Figure S4.</b> HR-ESI-MS of resolved cage <b>T</b> .....                                                                                        | S5 |
| 11. <b>Figure S5.</b> HR-ESI-MS of resolved cage $(Me_4N)_4[Ni_4L_6]$ .....                                                                            | S6 |
| 12. <b>Figure S6.</b> CD spectra of the resolved $(Me_4N)_4[Ni_4L_6]$ .....                                                                            | S6 |
| 13. <b>Figure S7.</b> Dynamic CD spectra of $\Delta\Delta\Delta\Delta$ - <b>T</b> and $\Lambda\Lambda\Lambda\Lambda$ - <b>T</b> .....                  | S7 |
| 14. <b>Figure S8.</b> CD spectra of $\Delta\Delta\Delta\Delta$ - <b>T</b> varied with time at 323 K.....                                               | S7 |
| 15. <b>Figure S9.</b> The $^1H$ NMR spectrum of $C_6H_{12}\Delta\Delta\Delta\Delta$ - <b>T</b> .....                                                   | S7 |
| 16. <b>Figure S10.</b> Fluorescence responses of ( <i>R</i> )- and ( <i>S</i> )-BINOL upon addition of $\Lambda\Lambda\Lambda\Lambda$ - <b>T</b> ..... | S8 |
| 17. <b>Scheme S1.</b> Optical resolution of <b>T</b> using ( <i>S</i> )-BINOL in methanol.....                                                         | S8 |
| 18. <b>Scheme S2.</b> Optical resolution of <b>T</b> using ( <i>R</i> )-BINOL.....                                                                     | S9 |
| 19. <b>Reference</b> .....                                                                                                                             | S9 |

## 1. General

The NMR spectra were measured with a Bruker Unity 500 MHz spectrometer using TMS as an internal standard for  $^1\text{H}$  NMR and a Bruker Unity 850 MHz spectrometer using 2-methyl-2-propanol as an internal standard for  $^{13}\text{C}$  NMR. Circular dichroism (CD) spectra were measured with a Jasco J-810 spectropolarimeter. The slit band width of CD spectra measurements was set at 2 nm. Mass spectral data were acquired using a Bruker Fourier transform ICR spectrometer. Fluorescence spectra were recorded on a F-7000 fluorescence spectrophotometer at an excitation wavelength of 280 nm with both of excitation and emission monochromators set at 2.5 nm. Elemental analyses for C, H, and N were performed on an Elementar Vario EL III elemental analyzer. Racemic  $(\text{Me}_4\text{N})_4[\text{Fe}_4\text{L}_6]$  and  $(\text{Me}_4\text{N})_4[\text{Ni}_4\text{L}_6]$  were synthesized according to literature.<sup>[S1,S2]</sup> The  $[\text{Ru}(\text{phen})_3](\text{PF}_6)_2$  was synthesized and resolved according to published procedures.<sup>[S3,S4]</sup> Solvents and commercially available reagents were used without further purification.

## 2. Resolution of cage T with Leu<sup>+</sup> and Bcic<sup>+</sup>.

*Rac*-( $\text{Me}_4\text{N}$ )<sub>4</sub>[ $\text{Fe}_4\text{L}_6$ ] 36 mg and Leu<sup>+</sup> 12 mg (Bcic<sup>+</sup> 17 mg) were added to a 50 mL flask containing methanol 15 mL. The reaction was stirred for 1 h at 50 °C. The less soluble salt ( $\Delta\Delta\Delta\Delta$ -T) was collected by centrifugation, washed with a small portion of methanol, and dried under vacuum. The remaining methanolic solution was concentrated on a rotational evaporator and the more soluble salt was obtained. The Leu<sup>+</sup> (Bcic<sup>+</sup>) ions were exchanged against  $\text{Me}_4\text{N}^+$  on a cation exchange column. ( $\text{Me}_4\text{N}$ )<sub>4</sub>[ $\text{Fe}_4\text{L}_6$ ] with enantiomer excess were isolated by slow vapor diffusion of acetone into their aqueous solutions.

## 3. Resolution of cage T with $[\text{Ru}(\text{phen})_3](\text{PF}_6)_2$

*Rac*-( $\text{Me}_4\text{N}$ )<sub>4</sub>[ $\text{Fe}_4\text{L}_6$ ] 36 mg and  $[\text{Ru}(\text{phen})_3](\text{PF}_6)_2$  9 mg were added to a 50 mL flask containing methanol 15 mL. The reaction was stirred for 1 h at 50 °C. The less soluble salt ( $\Delta\Delta\Delta\Delta$ -T) was collected by centrifugation, washed with a small portion of methanol, and dried under vacuum. The remaining methanolic solution was concentrated on a rotational evaporator and the more soluble salt was obtained. The  $[\text{Ru}(\text{phen})_3]^{2+}$  ions were exchanged against  $\text{Me}_4\text{N}^+$  on a cation exchange column. ( $\text{Me}_4\text{N}$ )<sub>4</sub>[ $\text{Fe}_4\text{L}_6$ ] with enantiomer excess were isolated by slow vapor diffusion of acetone into their aqueous solutions.

## 4. Resolution of cage T with BINOL.

*Rac*-( $\text{Me}_4\text{N}$ )<sub>4</sub>[ $\text{Fe}_4\text{L}_6$ ] 108 mg and (*S*)-BINOL (or (*R*)-BINOL) 36 mg were added to a 25 mL flask containing 6 mL water/methanol (v/v = 1:1). The reaction was stirred for 1 h at 50 °C. The less soluble diastereoisomer was collected by centrifugation and washed with water (3 × 2mL) and then with acetone, after that dried in vacuum, and last dissolved in 4 mL water/methanol (v/v = 1:1).  $\Delta\Delta\Delta\Delta$ -T was obtained by slow vapor diffusion of acetone into the water/methanol solution

for several days. Yield: 35%.  $\Delta\Delta\Delta\Delta$ -T was obtained from slow vapor diffusion of acetone into the filtrate. Yield: 45%.  $^1\text{H}$  NMR (500 MHz, 298 K,  $\text{D}_2\text{O}$ ):  $\delta$  = 9.29 (s, 12H, imine), 8.66 (d, 12H, 3-pyridine), 8.34 (t, 12H, 4-pyridine), 7.72 (t, 12H, 5-pyridine), 7.50 (d, 12H, 6-pyridine), 7.09 (d, 12H, 6,6'-benzidine), 6.38 (s, 12H, 3,3'-benzidine), 5.78 (d, 12H, 5,5'-benzidine), 3.30 ppm (s,  $[\text{NMe}_4]^+$ ).  $^{13}\text{C}$  NMR (212.5 MHz, 298 K,  $\text{D}_2\text{O}$ , referenced to 2-methyl-2-prop-anol at 29.5 ppm as internal standard):  $\delta$  = 176.0, 157.9, 155.7, 150.0, 143.1, 139.7, 135.9, 132.0, 131.9, 129.8, 121.7, 120.8. HR-ESI-MS:  $m/z$ : 1123.0083 ( $[\text{Fe}_4\text{L}_6]^{4+} + \text{Na}^+$ ), 548.0199 ( $[\text{FeL}_2]^{2-}$ ), 836.0117 ( $[\text{Fe}_2\text{L}_3]^{2-}$ ), 1124.5048 ( $[\text{Fe}_3\text{L}_4]^{2-}$ ), 1412.9976 ( $[\text{Fe}_4\text{L}_5]^{2-}$ ). Elemental analysis calcd for  $\text{C}_{160}\text{H}_{144}\text{N}_{28}\text{Fe}_4\text{O}_{36}\text{S}_{12} \cdot \text{Me}_2\text{CO} \cdot 20(\text{H}_2\text{O})$ : C 48.20, H 4.72, N 9.66; found C 48.31, H 4.80, N 9.50.

## 5. Resolution of cage $[\text{Ni}_4\text{L}_6]^{4+}$ with BINOL.

*Rac*-( $\text{Me}_4\text{N}$ ) $_4$  $[\text{Ni}_4\text{L}_6]$  108 mg and (*S*)-BINOL (or (*R*)-BINOL) 36 mg were added to a 25 mL flask containing 6 mL water/methanol (v/v = 1:1). The reaction was stirred for 1 h at 50°C. The less soluble diastereoisomer was collected by centrifugation and washed with water (3  $\times$  2 mL) and then with acetone, after that dried in vacuum, and last dissolved in 4 mL water/methanol (v/v = 1:1).  $\Delta\Delta\Delta\Delta$ -( $\text{Me}_4\text{N}$ ) $_4$  $[\text{Ni}_4\text{L}_6]$  was obtained by slow vapor diffusion of acetone into the water/methanol solution for several days. Yield: 30%.  $\Delta\Delta\Delta\Delta$ -( $\text{Me}_4\text{N}$ ) $_4$  $[\text{Ni}_4\text{L}_6]$  was obtained from slow vapor diffusion of acetone into the filtrate. Yield: 40%. HR-ESI-MS:  $m/z$ : 1143.7192 ( $[\text{Ni}_4\text{L}_6]^{4+} + \text{Me}_4\text{N}^+$ ), 839.0130 ( $[\text{Ni}_2\text{L}_3]^{2-}$ ), 1128.0081 ( $[\text{Ni}_3\text{L}_4]^{2-}$ ), 1418.0025 ( $[\text{Ni}_4\text{L}_5]^{2-}$ ).

## 6. The chiral stability of resolved cages upon complexation of cyclohexane.

Aqueous solution of  $\Delta\Delta\Delta\Delta$ -T (2.5 mL,  $1.4 \times 10^{-5} \text{ M}^{-1}$ ) and excess cyclohexane (0.1 mL, 1.52 mmol) were added to a cuvette. The sealed cuvette was heated in a water bath to 323 K for 6 h, and reaction progress was monitored by CD spectra.

7. **Figure S1.** CD spectra of cage **T** resolved by Leu<sup>+</sup> and Bcic<sup>+</sup>.

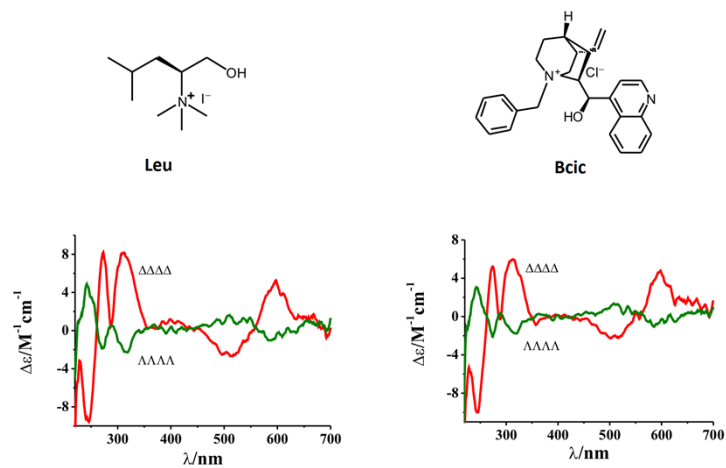

8. **Figure S2.** <sup>1</sup>H NMR spectrum of the resolved cage **T**.

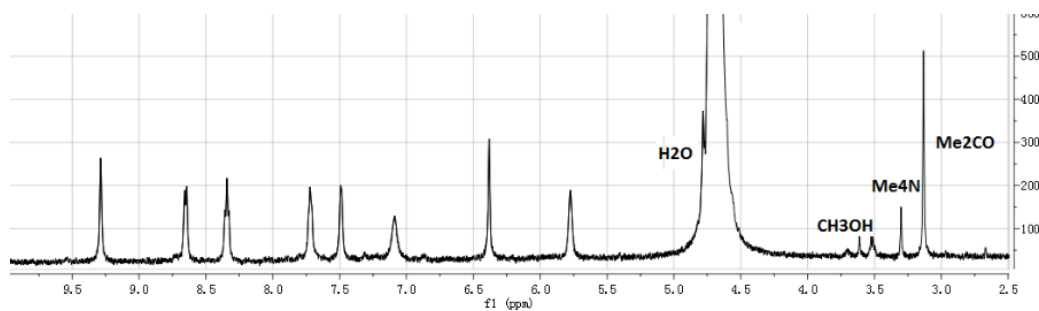

9. **Figure S3.** <sup>13</sup>C NMR spectrum of the resolved cage **T**.

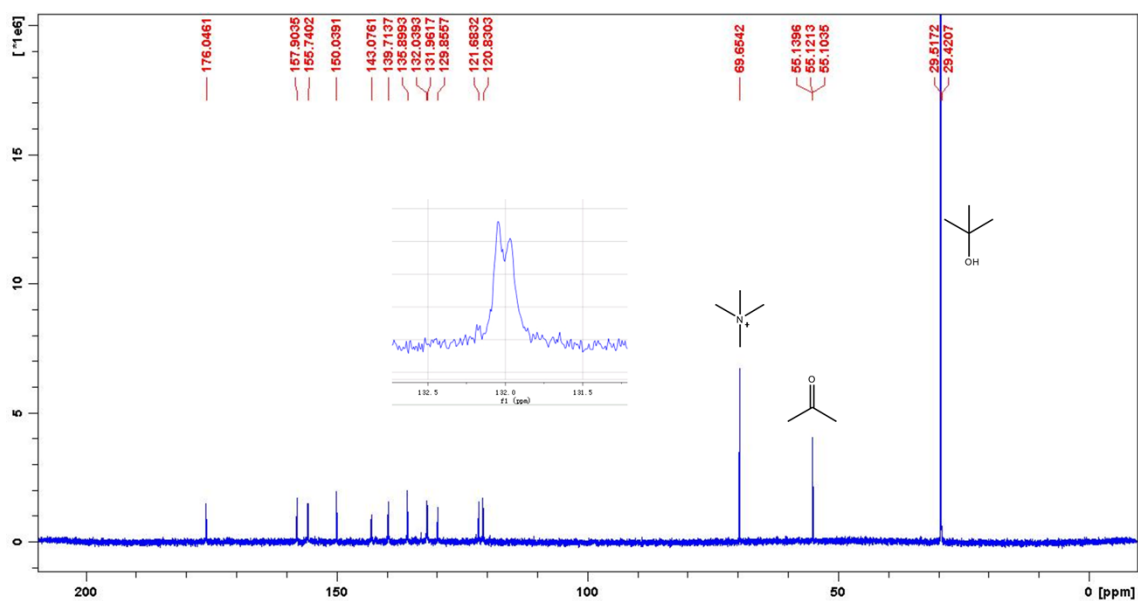

10. *Figure S4.* HR-ESI-MS of the resolved cage **T**.

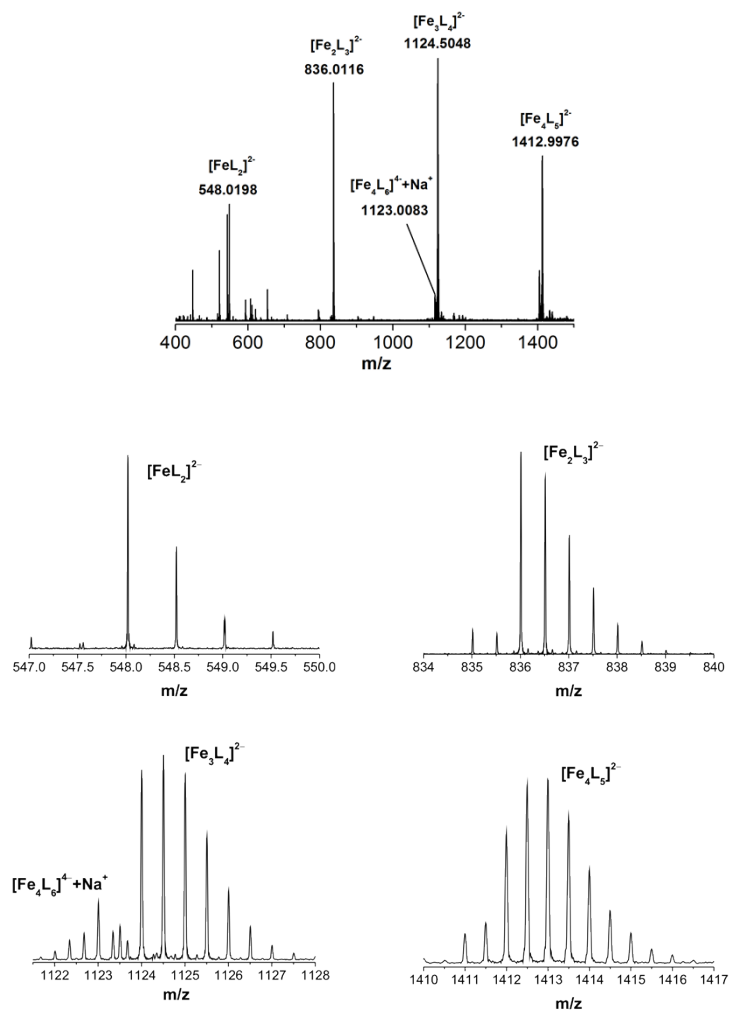

11. **Figure S5.** HR-ESI-MS of the resolved cage  $(\text{Me}_4\text{N})_4[\text{Ni}_4\text{L}_6]$ .

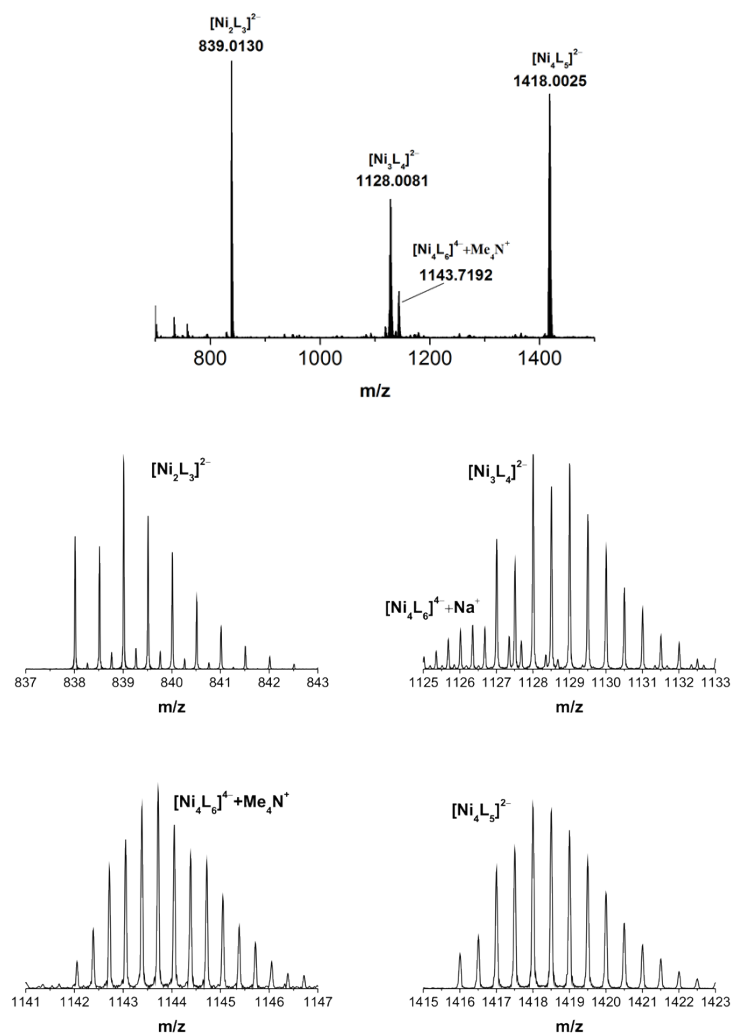

12. **Figure S6.** CD spectra of the resolved tetranuclear cluster  $[\text{Ni}_4\text{L}_6]^{4-}$ :  $\Delta\Delta\Delta\Delta$  (a) and  $\Lambda\Lambda\Lambda\Lambda$  (b) forms.

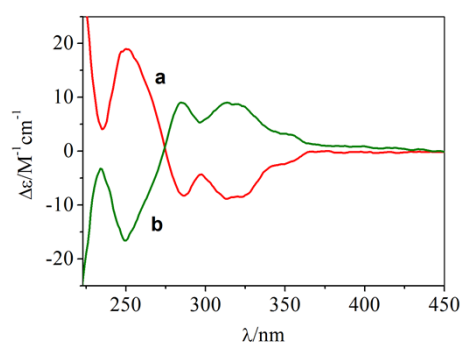

13. **Figure S7.** Dynamic CD spectra of  $\Delta\Delta\Delta\Delta$ -T and  $\Lambda\Lambda\Lambda\Lambda$ -T taken immediately after preparation of the 0.01 mM solution and after 30 days.

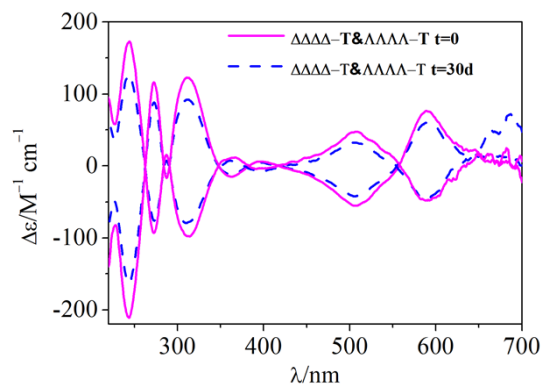

14. **Figure S8.** CD spectra of  $\Delta\Delta\Delta\Delta$ -T varied with time at 323 K: a) in the presence of cyclohexane ( $C_6H_{12}$ ); b) in the absence of  $C_6H_{12}$ .

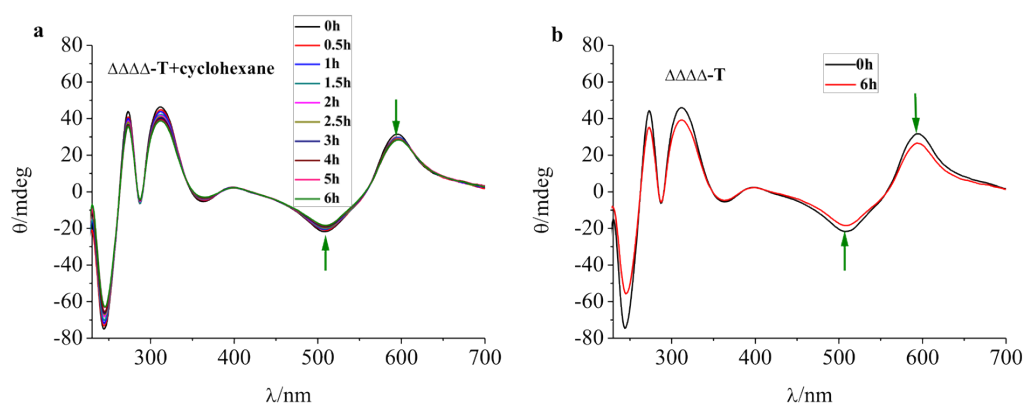

15. **Figure S9.** The  $^1H$  NMR spectrum of  $C_6H_{12}\Delta\Delta\Delta\Delta$ -T.

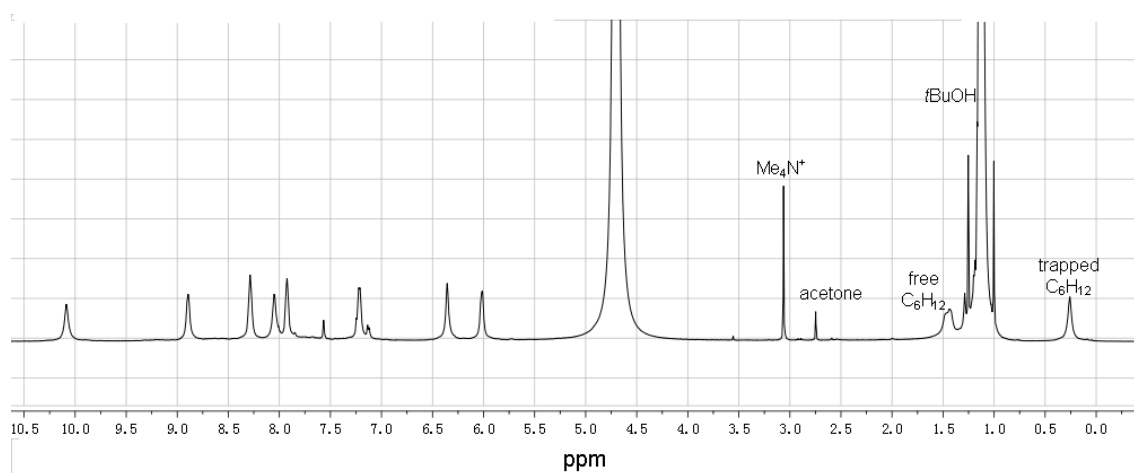

**16. Figure S10.** Fluorescence responses of (a) (*R*)-BINOL ( $2 \times 10^{-5}$  M) and (b) (*S*)-BINOL ( $2 \times 10^{-5}$  M) upon addition of  $\Lambda\Lambda\Lambda\Lambda$ -T at  $1.25 \times 10^{-6}$  M intervals; (c) the Benesi-Hildebrand plots.

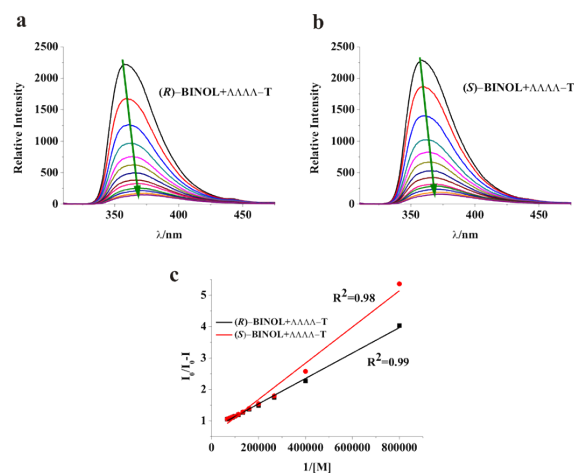

**17. Scheme S1.** Optical resolution of T using (*S*)-BINOL in methanol.

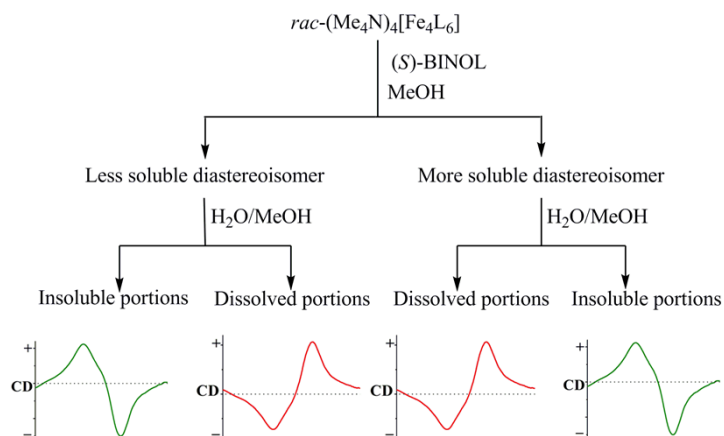



**18. Scheme S2.** Optical resolution of **T** using (*R*)-BINOL in 1:1 water-methanol solution followed by removal of (*R*)-BINOL during crystallization.

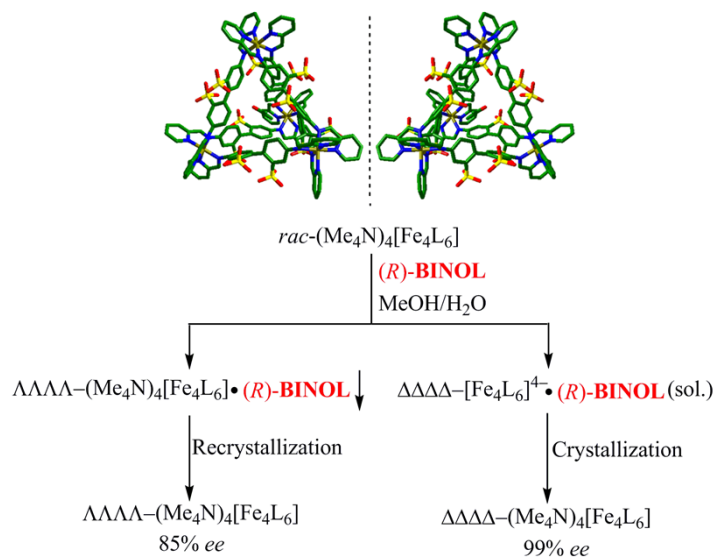

## 19. Reference

- [S1] P. Mal, D. Schultz, K. Beyeh, K. Rissanen, J. R. Nitschke, *Angew. Chem. Int. Ed.* 2008, **47**, 8297-8301.
- [S2] T. K. Ronson, C. Giri, N. K. Beyeh, A. Minkinen, F. Topić, J. J. Holstein, K. Rissanen, J. R. Nitschke, *Chem. Eur. J.* 2013, **19**, 3374-3382.
- [S3] J. N. Braddock, T. J. Meyer, *J. Am. Chem. Soc.* 1973, **95**, 3158-3162.
- [S4] K. A. McGee, K. R. Mann, *J. Am. Chem. Soc.* 2009, **131**, 1896-1902.
